# Supplementary material
Source: PubMed Central journal article supplement (PMC6932234)
Supplement: JB.00578-19-s0001.pdf [file JB.00578-19-s0001.pdf]

## Supplementary Tables and Figures

**Table S1. Strains and Plasmids**

| Strains                   | Genotype/Description                        | Source/Reference |
|---------------------------|---------------------------------------------|------------------|
| <i>Salmonella</i> strains |                                             |                  |
| 14028                     | Wild-type Salmonella strain                 | Lab collection   |
| QW165                     | 14028 <i>ycgR</i> ::KAN                     | Lab collection   |
| QW108                     | 14028 <i>yjhH</i> ::KAN                     | Lab collection   |
| VN55                      | 14028 <i>yjhH ycgR</i>                      | Lab collection   |
| JP1495                    | 14028 <i>yjhH ycgR bcsA</i>                 | This work        |
| <i>E. coli</i> strains    |                                             |                  |
| AW405                     | Wild-type                                   | 1                |
| HCB5                      | AW405 <i>fliC</i>                           | 2                |
| JP1442                    | AW405 <i>yjhH ycgR</i>                      | This work        |
| JP1762                    | JP1442 <i>bcsA</i>                          | This work        |
| JP1763                    | JP1442 <i>csgD</i>                          | This work        |
| JP1764                    | JP1442 <i>fimA</i>                          | This work        |
| JP1768                    | JP1442 <i>pgaC</i>                          | This work        |
| JP1769                    | JP1442 <i>wcaD</i>                          | This work        |
| JP1771                    | JP1442 <i>yjbE</i>                          | This work        |
| JP1836                    | JP1442 suppressor flare isolate 1           | This work        |
| JP1837                    | JP1442 suppressor flare isolate 2           | This work        |
| JP1838                    | JP1442 suppressor flare isolate 3           | This work        |
| JP1839                    | JP1442 suppressor flare isolate 4           | This work        |
| JP1844                    | JP1442 suppressor flare isolate 5           | This work        |
| JP1852                    | JP1442 suppressor flare isolate 6           | This work        |
| JP1932                    | JP1442 <i>bcsA csgD pgaC fimA wcaD yjbE</i> | This work        |
| JP1992                    | AW405 <i>rssA</i>                           | This work        |
| JP2063                    | MG1655 <i>lacZ</i> ::KAN                    | This work        |
| JP2065                    | AW405 <i>lacZ</i>                           | This work        |
| JP2066                    | JP1442 <i>lacZ</i>                          | This work        |

|         |                                        |           |
|---------|----------------------------------------|-----------|
| JP2173  | JP1442 <sup>a</sup> pJP319             | This work |
| JP2214  | JP2066 <i>rssAB</i> ::KAN              | This work |
| JP2079  | AW405 <i>rssB</i>                      | This work |
| JP2221  | AW405 <i>rssAB</i>                     | This work |
| JP2222  | JP1442 <i>rssAB</i>                    | This work |
| JP2347  | AW405 <i>clpX</i>                      | This work |
| JP2348  | JP1442 <i>clpX</i>                     | This work |
| JP2573  | AW405 <i>rpoS</i> ::KAN                | This work |
| JP2574  | JP1442 <i>rpoS</i> ::KAN               | This work |
| JP2586  | AW405 <i>clpX rpoS</i> ::KAN           | This work |
| JP2587  | JP1442 <i>rpoS</i> ::KAN <i>clpX</i>   | This work |
| JP2228  | NM580 <sup>b</sup> PflhD:: <i>lacZ</i> | This work |
| JP2234  | JP2228 <i>rssAB</i> ::KAN              | This work |
| JP2241  | JP2228 <i>ycgR yhjH</i>                | This work |
| JP2248a | JP2228 <i>ycgR yhjH rssAB</i>          | This work |
| JP2248b | JP2228 <i>clpX</i>                     | This work |
| JP2248c | JP2228 <i>ycgR yhjH clpX</i>           | This work |
| VN133   | AW405 <i>yhjH</i>                      | 3         |
| VN139   | AW405 <i>bcsA</i> ::KAN                | 4         |
| VN140   | AW405 <i>ycgR</i>                      | 3         |
| VN145   | HCB5 <i>yhjH</i>                       | This work |
| VN147   | HCB5 <i>yhjH ycgR</i> ::KAN            | This work |
| VN153   | HCB5 <i>ycgR</i> ::KAN                 | This work |

| Plasmid  | Expressed Protein                                                         | Host Plasmid | Resistance | Induction   | Reference |
|----------|---------------------------------------------------------------------------|--------------|------------|-------------|-----------|
| pBAD24   | <i>Para</i> <sub>BAD</sub> Expression vector                              | -            | Ampicillin | Arabinose   | (3)       |
| pCP20    | FLP Recombinase                                                           | -            | Ampicillin | Temperature | (2)       |
| pSEVA224 | Low-copy <i>lacI</i> <sup>q</sup> - <i>P</i> <i>trc</i> expression vector | -            | Kanamycin  | IPTG        | #         |
| pTRC99a  | <i>lacI</i> <sup>q</sup> - <i>P</i> <i>trc</i> Expression vector          | -            | Ampicillin | IPTG        | (1)       |
| pDgcA    | DgcA from <i>Caulobacter crescentus</i>                                   | pTRC99a      | Ampicillin | IPTG        | (4)       |

|         |                                     |          |                 |            |                |
|---------|-------------------------------------|----------|-----------------|------------|----------------|
| pFD313  | FliC <sup>sticky</sup>              | pTRC99a  | Ampicillin      | IPTG       | (5)            |
| pJP319  | RssAB                               | pTRC99a  | Ampicillin      | IPTG       | This work      |
| pJP388  | YcgR                                | pSEVA224 | Kanamycin       | IPTG       | This work      |
| pJP393  | RssA                                | pBAD24   | Ampicillin      | Arabinose  | This work      |
| pJP394  | RssB                                | pBAD24   | Ampicillin      | Arabinose  | This work      |
| pJP395  | RssB <sup>D58E</sup>                | pBAD24   | Ampicillin      | Arabinose  | This work      |
| pJP396  | RssB <sup>D58A</sup>                | pBAD24   | Ampicillin      | Arabinose  | This work      |
| pKD46   | $\lambda$ Red recombinase           | -        | Ampicillin      | Arabinose  | (2)            |
| pPA114  | Tsr                                 | pKG116   | Chloramphenicol | Salicylate | J.S.Parkinson  |
| pRR53   | Tsr                                 | pBR322   | Ampicillin/Tet  | IPTG       | J.S.Parkinson  |
| pRS1551 | <i>lac</i> reporter plasmid         | -        | Ampicillin      | -          | (9)            |
| pRZ30   | FRET reporter plasmid               | -        |                 |            | J.S.Parkinson  |
| pVN5    | YcgR from <i>S. enterica</i>        | pBAD24   | Ampicillin      | Arabinose  | (6)            |
| pVS88   | FRET reporter plasmid               | pTRC99a  | Ampicillin      | IPTG       | J.S.Parkinson  |
| pVS177  | <i>PfliA::lacZ</i> reporter plasmid | pRS1551  | Ampicillin      | -          | (10)           |
| pVS182  | <i>PflhD::lacZ</i> reporter plasmid | pRS1551  | Ampicillin      | -          | (10)           |
| pYhjH   | YhjH from <i>S. enterica</i>        | pTRC99a  | Ampicillin      | IPTG       | Lab collection |

<sup>a</sup> p=plasmid; <sup>b</sup> P=promoter; <sup>c</sup> All *E. coli* proteins, unless otherwise noted; # SEVA Resource  
<http://seva.cnb.csic.es/>

**Table S2. Mutational changes in pseudorevertants of JP 2173 (*ycgR yhjH/pRssAB*)**

| <b>Revertant Strain<sup>a</sup></b> | <b>Mutant Genes<sup>a</sup></b>                           | <b>Mutation (s)<sup>b</sup></b>                                                  | <b>Gene Function<sup>c</sup></b>                                                                          |
|-------------------------------------|-----------------------------------------------------------|----------------------------------------------------------------------------------|-----------------------------------------------------------------------------------------------------------|
| <b>JP2372</b>                       | <i>pitA</i><br><i>rssAB</i>                               | $\Delta$ 635-636 nt<br>$\Delta$ 2-1734 nt                                        | Phosphate transporter<br>Regulator of RpoS                                                                |
| <b>JP2373</b>                       | <i>pitA</i>                                               | A391T (GCG→ACG)                                                                  | Phosphate transporter                                                                                     |
| <b>JP2374</b>                       | <i>sspA</i><br><i>rssAB</i>                               | +295-303 nt<br>$\Delta$ 4-1687 nt                                                | Stringent starvation protein A<br>Regulator of RpoS                                                       |
| <b>JP2375</b>                       | <i>pitA</i>                                               | G456E (GGG→GAG)                                                                  | Phosphate transporter                                                                                     |
| <b>JP2376</b>                       | <i>pitA</i><br><i>rssAB</i>                               | G456E (GGG→GAG)<br>$\Delta$ 1-1704 nt                                            | Phosphate transporter<br>Regulator of RpoS                                                                |
| <b>JP2377</b>                       | <i>cheB</i><br><i>pitA</i>                                | P193L (CCC→CTC)<br>$\Delta$ 802-810 nt                                           | Chemotaxis methyltransferase<br>Phosphate transporter                                                     |
| <b>JP2378</b>                       | <i>pitA</i><br><i>fliZ</i>                                | G423E (GGG→GAG)<br>Q124* (CAA→TAA)                                               | Phosphate transporter<br>Regulator of FliA                                                                |
| <b>JP2379</b>                       | <i>pitA</i><br><i>rssAB</i>                               | R404L (CGT→CTT)<br>$\Delta$ 3-1745 nt                                            | Phosphate transporter<br>Regulator of RpoS                                                                |
| <b>JP2380</b>                       | <i>cheB</i><br><i>pitA</i><br><i>rssAB</i>                | G284S (GGC→AGC)<br>+IS1, +529-537 nt<br>$\Delta$ 13-1677nt                       | Chemotaxis methyltransferase<br>Phosphate transporter<br>Regulator of RpoS                                |
| <b>JP2381</b>                       | <i>pitA</i><br><i>rssAB</i>                               | W477* (TGG→TAG)<br>$\Delta$ 4-1709 nt                                            | Phosphate transporter<br>Regulator of RpoS                                                                |
| <b>JP2382</b>                       | <i>pitA</i><br><i>rssAB</i>                               | W477* (TGG→TAG)<br>$\Delta$ 1-1707 nt                                            | Phosphate transporter<br>Regulator of RpoS                                                                |
| <b>JP2383</b>                       | <i>fliM</i><br><i>pitA</i><br><i>rssAB</i>                | N249Y (AAC→TAC)<br>$\Delta$ 391-395 nt<br>$\Delta$ 5-1717 nt                     | Flagella motor switching component<br>Phosphate transporter<br>Regulator of RpoS                          |
| <b>JP2384</b>                       | <i>pitA</i>                                               | $\Delta$ 391-395 nt                                                              | Phosphate transporter                                                                                     |
| <b>JP2385</b>                       | <i>cheB</i><br><i>pitA</i><br><i>rssAB</i>                | H233N (CAT→AAT)<br>$\Delta$ 114-115 nt<br>$\Delta$ 1-1746 nt                     | Chemotaxis methyltransferase<br>Phosphate transporter<br>Regulator of RpoS                                |
| <b>JP2386</b>                       | <i>pitA</i><br><i>rssAB</i>                               | $\Delta$ 1080-1180 bp<br>$\Delta$ 1-1694 nt                                      | Phosphate transporter<br>Regulator of RpoS                                                                |
| <b>JP2387</b>                       | <i>cheB</i><br><i>glrK</i><br><i>pitA</i><br><i>rssAB</i> | R316C (CGC→TGC)<br>$\Delta$ 130-1890 nt<br>W112* (TGG→TAG)<br>$\Delta$ 3-1718 nt | Chemotaxis methyltransferase<br>Sensor kinase for glmY sRNA<br>Phosphate transporter<br>Regulator of RpoS |
| <b>JP2388</b>                       | <i>fliM</i>                                               | N249Y (AAC→TAC)                                                                  | Flagella motor switching component                                                                        |

|               |                                                           |                                                                                |                                                                                                   |
|---------------|-----------------------------------------------------------|--------------------------------------------------------------------------------|---------------------------------------------------------------------------------------------------|
|               | <i>pitA</i><br><i>rssAB</i>                               | + 391-395 nt<br>$\Delta$ 1-1719 nt                                             | Phosphate transporter<br>Regulator of RpoS                                                        |
| <b>JP2389</b> | <i>cheB</i><br><i>pitA</i><br><i>rssAB</i>                | D37E (GAT→GAA)<br>+391-395 nt<br>$\Delta$ 7-1690 nt                            | Chemotaxis methylesterase<br>Phosphate transporter<br>Regulator of RpoS                           |
| <b>JP2390</b> | <i>cheB</i><br><i>pitA</i><br><i>yahG</i><br><i>rssAB</i> | H233N (CAT→AAT)<br>$\Delta$ 114-115nt<br>K129R (AAA→AGA)<br>$\Delta$ 1-1697 nt | Chemotaxis methylesterase<br>Phosphate transporter<br>DUF1116 family protein<br>Regulator of RpoS |
| <b>JP2391</b> | <i>cheB</i><br><i>pitA</i><br><i>rssAB</i>                | T168A (ACT→GCT)<br>W181* (TGG→TAG)<br>$\Delta$ 1-1691 nt                       | Chemotaxis methylesterase<br>Phosphate transporter<br>Regulator of RpoS                           |

<sup>a</sup>Mutational changes were identified by whole genome sequencing of twenty independent pseudorevertants using Breseq (19). <sup>b</sup>+, insertion;  $\Delta$ , deletion; nt, Nucleotide; \*, STOP codon; IS1, Insertion Sequence 1. <sup>c</sup>Gene product descriptions are from Genbank annotations. The *rssAB* deletions refer to nucleotides in the *rssAB* operon (1920 nt) rather than the individual genes. Full details of <sup>d</sup>JP strains found in Table S1.

**Table S3. Statistical analysis of motility data presented in Fig. 5.**

| <b>Strain Comparisons<sup>a</sup></b>                                             | <b><i>p</i>-value<sup>b</sup></b> |
|-----------------------------------------------------------------------------------|-----------------------------------|
| <b>A)</b>                                                                         |                                   |
| Wild-type vs. <i>ycgR yhjH</i>                                                    | <0.0001                           |
| Wild-type vs. <i>ycgR yhjH rssA</i>                                               | <0.0001                           |
| Wild-type vs. <i>ycgR yhjH rssB</i>                                               | <0.05                             |
| Wild-type vs. <i>ycgR yhjH rssAB</i>                                              | NS                                |
| <i>ycgR yhjH</i> vs. <i>ycgR yhjH rssA</i>                                        | NS                                |
| <i>ycgR yhjH</i> vs. <i>ycgR yhjH rssB</i>                                        | <0.0001                           |
| <i>ycgR yhjH</i> vs. <i>ycgR yhjH rssAB</i>                                       | <0.0001                           |
| <i>ycgR yhjH rssA</i> vs. <i>ycgR yhjH rssB</i>                                   | <0.0001                           |
| <i>ycgR yhjH rssA</i> vs. <i>ycgR yhjH rssAB</i>                                  | <0.0001                           |
| <i>ycgR yhjH rssB</i> vs. <i>ycgR yhjH rssAB</i>                                  | NS                                |
| <br>                                                                              |                                   |
| <i>ycgR yhjH</i> pCtrl vs. <i>ycgR yhjH</i> pRssA                                 | NS                                |
| <i>ycgR yhjH</i> pCtrl vs. <i>ycgR yhjH</i> pRssB                                 | <0.0001                           |
| <i>ycgR yhjH</i> pCtrl vs. <i>ycgR yhjH</i> pRssB <sup>D58E</sup>                 | <0.0001                           |
| <i>ycgR yhjH</i> pCtrl vs. <i>ycgR yhjH</i> pRssB <sup>D58A</sup>                 | NS                                |
| <i>ycgR yhjH</i> pRssA vs. <i>ycgR yhjH</i> pRssB                                 | <0.0001                           |
| <i>ycgR yhjH</i> pRssA vs. <i>ycgR yhjH</i> pRssB <sup>D58E</sup>                 | <0.0001                           |
| <i>ycgR yhjH</i> pRssA vs. <i>ycgR yhjH</i> pRssB <sup>D58A</sup>                 | NS                                |
| <i>ycgR yhjH</i> pRssB vs. <i>ycgR yhjH</i> pRssB <sup>D58E</sup>                 | <0.01                             |
| <i>ycgR yhjH</i> pRssB vs. <i>ycgR yhjH</i> pRssB <sup>D58A</sup>                 | <0.0001                           |
| <i>ycgR yhjH</i> pRssB <sup>D58E</sup> vs. <i>ycgR yhjH</i> pRssB <sup>D58A</sup> | <0.0001                           |
| <b>B)</b>                                                                         |                                   |
| Wild-type vs. <i>ycgR yhjH</i>                                                    | <0.0001                           |
| Wild-type vs. <i>rpoS</i>                                                         | <0.01                             |
| Wild-type vs. <i>ycgR yhjH rpoS</i>                                               | <0.0001                           |
| Wild-type vs. <i>clpX</i>                                                         | <0.001                            |
| Wild-type vs. <i>ycgR yhjH clpX</i>                                               | <0.0001                           |
| Wild-type vs. <i>ycgR yhjH clpX rssAB</i>                                         | <0.0001                           |
| Wild-type vs. <i>ycgR yhjH clpX rpoS</i>                                          | <0.0001                           |

|                                                                  |         |
|------------------------------------------------------------------|---------|
| Wild-type vs. <i>ycgR yhjH clpX rpoS rssAB</i>                   | <0.0001 |
| <i>ycgR yhjH</i> vs. <i>rpoS</i>                                 | <0.0001 |
| <i>ycgR yhjH</i> vs. <i>ycgR yhjH rpoS</i>                       | NS      |
| <i>ycgR yhjH</i> vs. <i>clpX</i>                                 | <0.0001 |
| <i>ycgR yhjH</i> vs. <i>ycgR yhjH clpX</i>                       | <0.0001 |
| <i>ycgR yhjH</i> vs. <i>ycgR yhjH clpX rssAB</i>                 | NS      |
| <i>ycgR yhjH</i> vs. <i>ycgR yhjH clpX rpoS</i>                  | NS      |
| <i>ycgR yhjH</i> vs. <i>ycgR yhjH clpX rpoS rssAB</i>            | NS      |
| <i>rpoS</i> vs. <i>ycgR yhjH rpoS</i>                            | <0.0001 |
| <i>rpoS</i> vs. <i>clpX</i>                                      | NS      |
| <i>rpoS</i> vs. <i>ycgR yhjH clpX</i>                            | <0.0001 |
| <i>rpoS</i> vs. <i>ycgR yhjH clpX rssAB</i>                      | <0.0001 |
| <i>rpoS</i> vs. <i>ycgR yhjH clpX rpoS</i>                       | <0.0001 |
| <i>rpoS</i> vs. <i>ycgR yhjH clpX rpoS rssAB</i>                 | <0.0001 |
| <i>ycgR yhjH rpoS</i> vs. <i>clpX</i>                            | <0.0001 |
| <i>ycgR yhjH rpoS</i> vs. <i>ycgR yhjH clpX</i>                  | <0.0001 |
| <i>ycgR yhjH rpoS</i> vs. <i>ycgR yhjH clpX rssAB</i>            | NS      |
| <i>ycgR yhjH rpoS</i> vs. <i>ycgR yhjH clpX rpoS</i>             | NS      |
| <i>ycgR yhjH rpoS</i> vs. <i>ycgR yhjH clpX rpoS rssAB</i>       | NS      |
| <i>clpX</i> vs. <i>ycgR yhjH clpX</i>                            | <0.0001 |
| <i>clpX</i> vs. <i>ycgR yhjH clpX rssAB</i>                      | <0.0001 |
| <i>clpX</i> vs. <i>ycgR yhjH clpX rpoS</i>                       | <0.0001 |
| <i>clpX</i> vs. <i>ycgR yhjH clpX rpoS rssAB</i>                 | <0.0001 |
| <i>ycgR yhjH clpX</i> vs. <i>ycgR yhjH clpX rssAB</i>            | <0.0001 |
| <i>ycgR yhjH clpX</i> vs. <i>ycgR yhjH clpX rpoS</i>             | <0.0001 |
| <i>ycgR yhjH clpX</i> vs. <i>ycgR yhjH clpX rpoS rssAB</i>       | <0.0001 |
| <i>ycgR yhjH clpX rssAB</i> vs. <i>ycgR yhjH clpX rpoS</i>       | NS      |
| <i>ycgR yhjH clpX rssAB</i> vs. <i>ycgR yhjH clpX rpoS rssAB</i> | NS      |
| <i>ycgR yhjH clpX rpoS</i> vs. <i>ycgR yhjH clpX rpoS rssAB</i>  | NS      |

<sup>a</sup>A and B refer to strains tested in Fig. 5A and B. <sup>b</sup>Data were processed using One way ANOVA (Tukey's Comparison) using Graphpad Prism 6, with calculated *p*-values shown.

**Fig. S1**

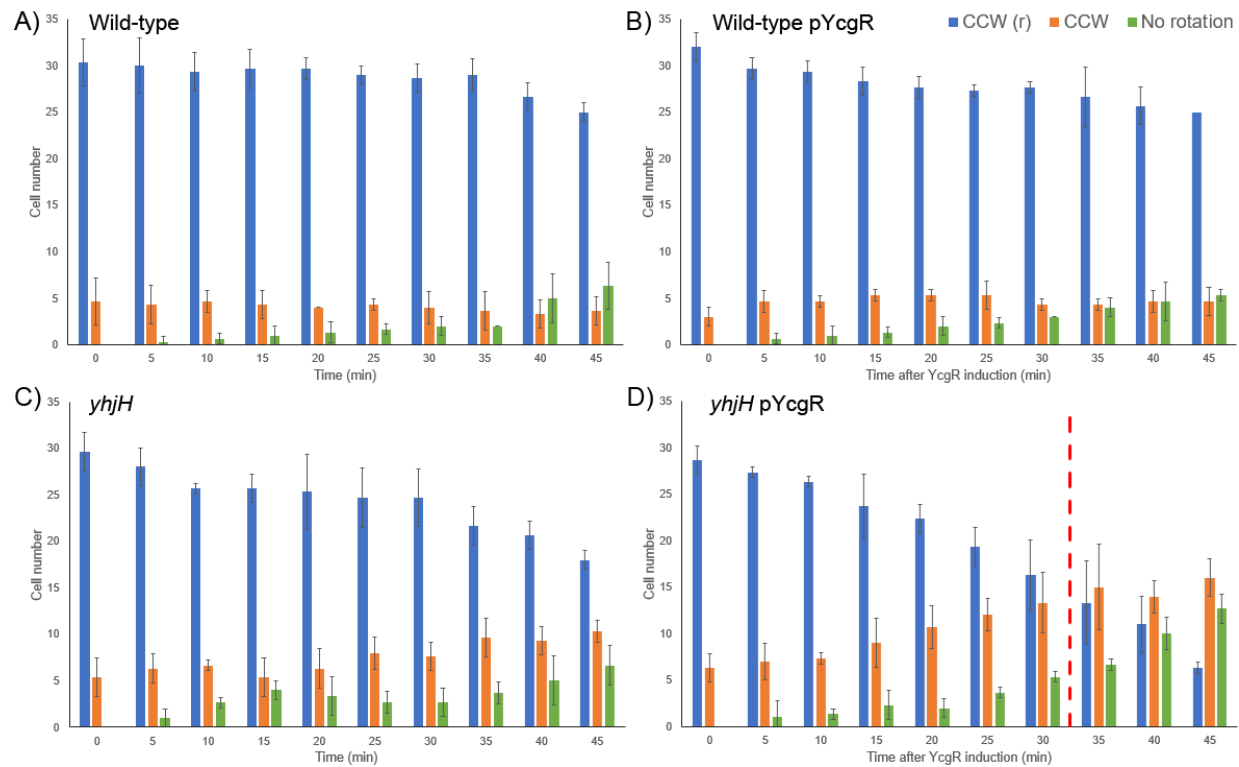

**Figure S1. Time course monitoring motor speed and bias in response to YcgR induction using a whole-cell tethering assay in *Salmonella*.** Strains monitored are A) WT *S. enterica* (14028), B) WT with pYcgR, C) Isogenic *yhjH* deletion strain, D) *yhjH* with pYcgR (pVN5). In each experiment, performed thrice independently, 35 tethered cells were recorded for 45 min and analyzed during playback at 5 min intervals, with or without induction of YcgR from a plasmid with 0.2% arabinose inducer. Motor behavior was scored for the three indicated categories: CCW<sub>r</sub>, CCW, and Stopped. The basal motor behavior of WT was CCW with reversals (CCW<sub>r</sub>) (A). This behavior was fairly constant, with a small increase in the number of stopped motors by the end of the observation period. For an isogenic *yhjH* strain (C), where a chromosomal copy of *ycgR* is still present, the expectation was that the motors would be more CCW biased as observed with *E. coli* motors (Fig. 1). However, the rotation bias was being determined visually, and a small change in bias from the WT might have been missed due to the inherently smooth (i.e. CCW-biased) nature of the motors with (7). The CCW population increased slightly over the course of the experiment, as



did the fraction of stopped motors (C). Motor speeds were not computed because they are low to begin with in this assay (~150 revolutions per min; (8)). When a plasmid expressing YcgR was introduced in both strains, and the inducer arabinose was added, the pattern of motor behavior in the WT strain remained unchanged (compare B with A). In the *yhjH* strain, however, CCW<sub>r</sub> population began to steadily decrease upon addition of the inducer, with a reciprocal increase in the CCW population (D). These two trends merged at 35 min, and at this time (dotted red line), greater than 50% of the cell population exhibited visibly slower speeds compared to the same population at the start of the experiment. The “stopped motor” population began to increase around this time point as well. Despite the subjective nature of this experiment, the overall trend of the data in D clearly showed that upon YcgR induction, the shift in motor bias was observed first and arrest of motor rotation occurred later, implying that changes at the rotor preceded those at the stators.

Figure S2

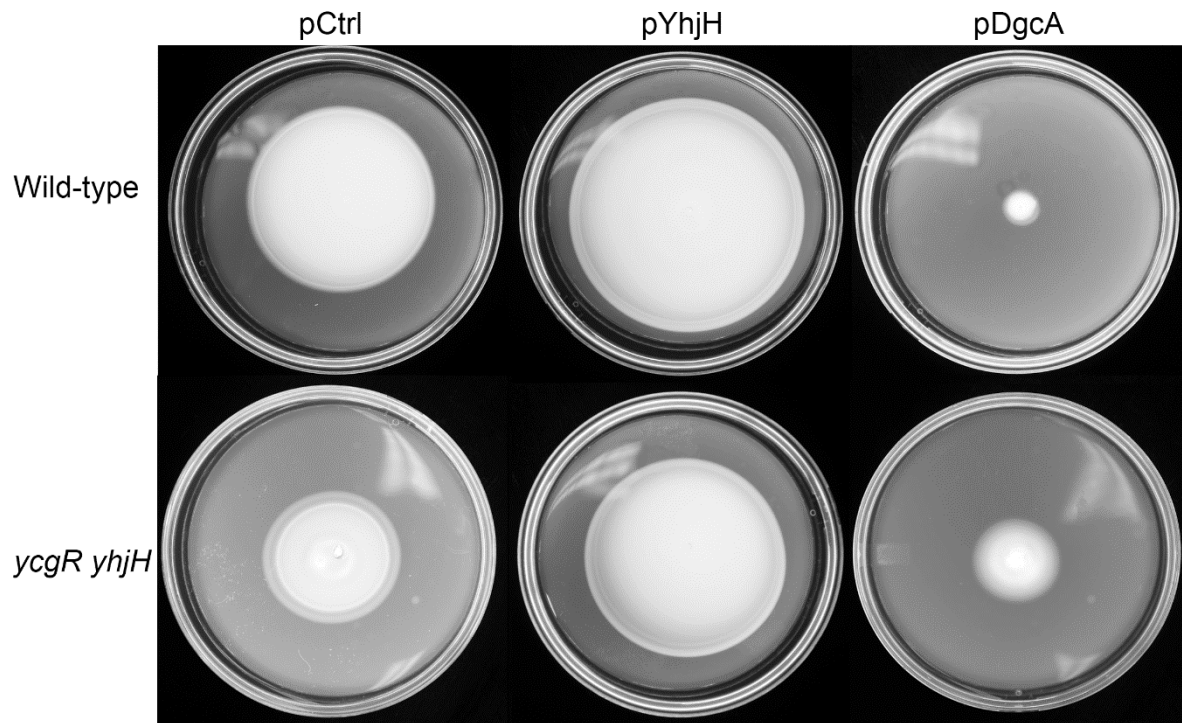

**Figure S2. Effect of overexpression of YhjH and DgcA on *E. coli* motility.** Wild-type *E. coli* and its *ycgR yhjH* mutant derivative were transformed with a control plasmid (empty vector), pYhjH or pDgcA plasmids, before inoculation at the center of 0.3% LB swim agar plates supplemented with ampicillin (plasmid selection), and 0.2% arabinose (inducer for expression of cloned genes) and incubated at 30°C for 8 h.

## References

1. **Amann, E., B. Ochs, and K. J. Abel.** 1988. Tightly regulated tac promoter vectors useful for the expression of unfused and fused proteins in *Escherichia coli*. *Gene* **69**:301-315.
2. **Datsenko, K. A., and B. L. Wanner.** 2000. One-step inactivation of chromosomal genes in *Escherichia coli* K-12 using PCR products. *Proc Natl Acad Sci U S A* **97**:6640-6645.
3. **Guzman, L. M., D. Belin, M. J. Carson, and J. Beckwith.** 1995. Tight regulation, modulation, and high-level expression by vectors containing the arabinose PBAD promoter. *J Bacteriol* **177**:4121-4130.
4. **Kim, H. K., and R. M. Harshey.** 2016. A Diguanylate Cyclase Acts as a Cell Division Inhibitor in a Two-Step Response to Reductive and Envelope Stresses. *MBio* **7**.
5. **Kuwajima, G.** 1988. Construction of a minimum-size functional flagellin of *Escherichia coli*. *J Bacteriol* **170**:3305-3309.
6. **Nieto, V.** 2013. The c-di-GMP binding protein, YcgR, is the primary inhibitor of motor function in *Salmonella* and *Escherichia coli*. Ph.D. . University of Texas, Austin.
7. **Partridge, J. D., V. Nieto, and R. M. Harshey.** 2015. A new player at the flagellar motor: FliL controls both motor output and bias. *MBio* **6**:e02367.
8. **Paul, K., V. Nieto, W. C. Carlquist, D. F. Blair, and R. M. Harshey.** 2010. The c-di-GMP binding protein YcgR controls flagellar motor direction and speed to affect chemotaxis by a "backstop brake" mechanism. *Molecular cell* **38**:128-139.
9. **Simons, R. W., F. Houman, and N. Kleckner.** 1987. Improved single and multicopy lac-based cloning vectors for protein and operon fusions. *Gene* **53**:85-96.
10. **Sperandio, V., A. G. Torres, J. A. Giron, and J. B. Kaper.** 2001. Quorum sensing is a global regulatory mechanism in enterohemorrhagic *Escherichia coli* O157:H7. *J Bacteriol* **183**:5187-5197.
